# Supplementary material for: Integration-Free iPS Cells Engineered Using Human Artificial Chromosome Vectors
Source: PLoS One. 2011 Oct 5;6(10):e25961. doi: 10.1371/journal.pone.0025961 (PMC3187830; doi:10.1371/journal.pone.0025961)
Supplement: Table S1 — Primers used for PCR analyses. (XLS) [file pone.0025961.s007.xls]

## Sheet: Sheet1
Supplementary Table 1. Primers used for PCR analyses.
Genomic PCR
D8Mit224	D8Mit224-Fwd	ACGTCCCCAGTGCTTAACAC
	D8Mit224-Rev	TGGTGTAGCATAAAGCATATGTCC
Klf	mKlf4_qRT_F1256	GAGAAACCTTACCACTGTGAC
	CAGpA_rev1764	CAGCCACCACCTTCTGATAGG
c-Myc	mcMyc_fwd1133	CTGCGTGACCAGATCCCTG
	CAGpA_rev1764	CAGCCACCACCTTCTGATAGG
Sox	mSox_fwd778	TGGTTACCTCTTCCTCCCAC
	CAGpA_rev1764	CAGCCACCACCTTCTGATAGG
Oct	mOct_fwd996	CACTCTACTCAGTCCCTTTTCCTG
	CAGpA_rev1764	CAGCCACCACCTTCTGATAGG
p53shRNA	HS4_F30	GCACCGCTCTTTGGAGAAGGTAAATCTTGC
	mp53sh_R29	GTGGTCTCATACAGAACTTATAAGATTCC
HPRT	HPRT400F	TGGAGGCCATAAACAAGAAGA
	HPRT400R	CCTTGACCCAGAAATTCCAC
qRT-PCR(CHO)
GAPDH	CHO_GAP_qRT_F	AGAAGGTGGTGAAGCAGGCAT
	CHO_GAP_qRT_R	AGGTCCACCACTCTGTTGCTGT
Klf	mKlf4_qRT_F1354	CTTTCAGTGCCAGAAGTGTGAC
	CAGpA_qRT_R1	ACCACCTTCTGATAGGCAGC
c-Myc	mcMyc_fwd1133	CTGCGTGACCAGATCCCTG
	CAGpA_rev1764	CAGCCACCACCTTCTGATAGG
Sox	mSox_fws778	TGGTTACCTCTTCCTCCCAC
	CAGpA_rev1764	CAGCCACCACCTTCTGATAGG
Oct	mOct_fwd1051	TGCTCTGGGCTCTCCCATGC
	CAGpA_rev1764	CAGCCACCACCTTCTGATAGG
qRT-PCR(mouse)
Klf4 Total	Klf4T_F	CGGGAAGGGAGAAGACACT
	Klf4T_R	GAGTTCCTCACGCCAACG
Klf4 Endo	Klf4_F	GGCGAGAAACCTTACCACTGT
	Klf4_R	TACTGAACTCTCTCTCCTGGCA
c-Myc Total	MycT_F	CCTAGTGCTGCATGAGGAGA
	MycT_R	TCTTCCTCATCTTCTTGCTCTTC
c-Myc Endo	cMyc_F	TCAAGCAGACGAGCACAAGC
	cMyc_R	TACAGTCCCAAAGCCCCAGC
Sox2 Total	Sox2T_F	ACAGCTACGCGCACATGA
	Sox2T_R	GGTAGCCAGCTGCTCCT
Sox2 Endo	Sox2-3_F	TCTGTGGTCAAGTCCGAGGC
	Sox2UTR_R	TTCTCCGTTCGCAGTCCAG
Oct4 Total	Oct4T_F	GTTGGAGAAGGTGGAACCAA
	Oct4T_R	CTCCTTCTGCAGGGCTTTC
Oct4 End	Oct4-906F	CCAACGAGAAGAGTATGAGGC
	Oct4UTR_R	GTGCTTTTAATCCCTCCTCAG
Dppa5a	mDppa5-S319	CGGCTCTAAAACAACAAGA
	mDppa5-AS420	GATTCCTCCAGCTTCAGCAC
Utf1	mUtf1-S531	GTCCCTCTCCGCGTTAGC
	mUtf1-AS617	GGGGCAGGTTCGTCATTT
Dnmt3l	mDnmt3l-S372	AACCGACGGAGCATTGAA
	mDnmt3l-AS431	CCGAGTGTACACCTGGAGAGT
Esrrb	mEsrrb-S809	CGATTCATGAAATGCCTCAA
	mEsrrb-AS876	CCTCCTCGAACTCGGTCA
Nanog	mNanog-S320R	TTCTTGCTTACAAGGGTCTGC
	mNanog-AS386R	AGAGGAAGGGCGAGGAGA
Ecat1	mEcat1-S294	GGCGAGCTGAGATTTGGATA
	mEcat1-AS414	CCAGCCTCCAGAGCCTCTAT
Dppa3	Dppa3_FT	GATGCACAACGATCCAGATTT
	Dppa3_RT	TGGAATTAGAACGTACATACTCCAA
Tcl1	Tcl1_F	GCTTCCTCTCTGGGTGTTCA
	Tcl1_R	CCCACACATTCCCTTTCAAC
Rex1	mRex1-S215	TCTTCTCTCAATAGAGTGAGTGTGC
	mRex1-AS420	GCTTTCTTCTGTGTGCAGGA
Gbx2	Gbx2_F	GCTGCTCGCTTTCTCTGC
	Gbx2_R	GCTGTAATCCACATCGCTCTC
Arf	mArf-F	GCCGCACCGGAATCCT
	mArf-R	TTGAGCAGAAGAGCTGCTACGT
Ink4a	mInk4a-F	CGTACCCCGATTCAGGTGAT
	mInk4a-R	TTGAGCAGAAGAGCTGCTACGT
Cip1	mp21-F	GTGGGTCTGACTCCAGCCC
	mp21-R	CCTTCTCGTGAGACGCTTAC
p53	Trp53-F4	ACGCTTCTCCGAAGACTGG
	Trp53-R4	AGGGAGCTCGAGGCTGATA
Nat1	Nat1-U283	ATTCTTCGTTGTCAAGCCGCCAAAGTGGAG
	Nat1-L476	AGTTGTTTGCTGCGGAGTTGTCATCTCGTC
